# Supplementary material for: Synthesis of highly active rhodium-doped SrTiO3 powders in Z-scheme systems for visible-light-driven photocatalytic overall water splitting
Source: Royal Society of Chemistry journal article supplement (doi:10.1039/c3ta12803b), 2013-01-01
Supplement: c3ta12803b.pdf [file c3ta12803b.pdf]

Supplementary information for:

**Synthesis of highly active rhodium-doped SrTiO<sub>3</sub> powders in Z-scheme systems for  
visible-light-driven photocatalytic overall water splitting**

Hideki Kato,<sup>a,†</sup> Yasuyoshi Sasaki,<sup>a</sup> Nana Shirakura,<sup>a</sup> and Akihiko Kudo<sup>a,b,\*</sup>

<sup>a</sup>Department of Applied Chemistry, Faculty of Science, Tokyo University of Science,

1-3 Kagurazaka, Shinjuku-ku, Tokyo 162-8601, JAPAN

<sup>b</sup>Photocatalysis International Research Center, Research Institute for Science and  
Technology, Tokyo University of Science

<sup>†</sup>Present address: Institute of Multidisciplinary Research for Advanced Materials, Tohoku  
University, 2-1-1 Katahira, Aoba-ku, Sendai 980-8577, JAPAN

Corresponding author

Professor Akihiko KUDO

Department of Applied Chemistry, Faculty of Science, Tokyo University of Science,

1-3 Kagurazaka, Shinjuku-ku, Tokyo 162-8601, JAPAN

E-mail: a-kudo@rs.kagu.tus.ac.jp

Tel: +81-3-5228-8267

Fax: +81-3-5261-4631

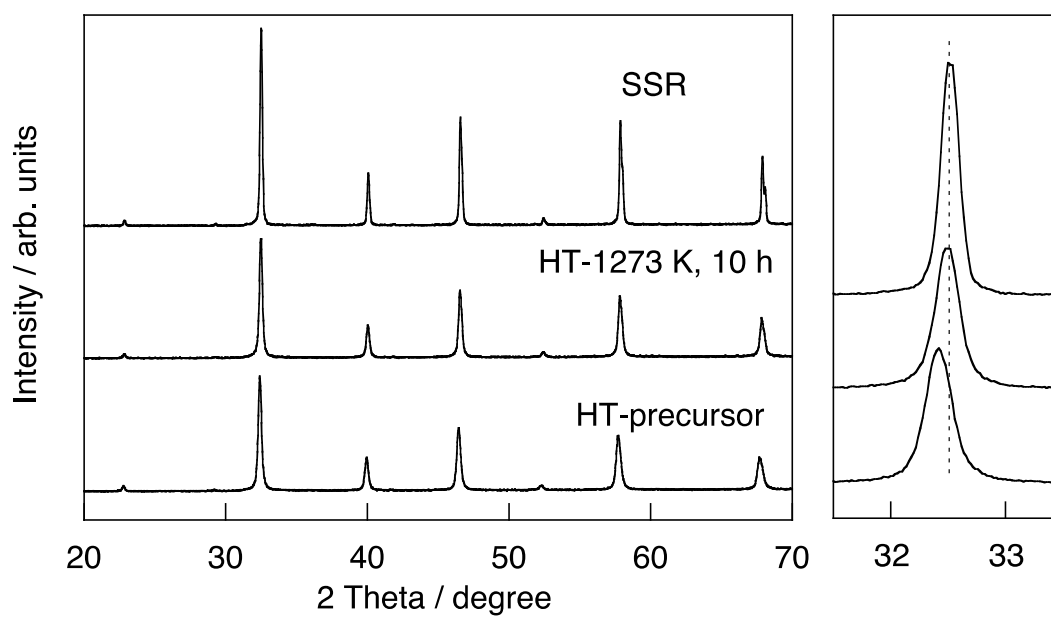

**Fig. S1** XRD patterns of non-doped SrTiO<sub>3</sub> prepared by SSR and HT methods.
